# Supplementary material for: Fast Collisional Lipid Transfer Among Polymer-Bounded Nanodiscs
Source: PubMed Central journal article supplement (PMC5381093; doi:10.1038/srep45875), 2017-04-05
Supplement: srep45875-s1.pdf [file srep45875-s1.pdf]

## Supplementary Information

### Fast Collisional Lipid Transfer Among Polymer-Bounded Nanodiscs

Rodrigo Cuevas Arenas<sup>1,#</sup>, Bartholomäus Danielczak<sup>1,#</sup>, Anne Martel<sup>2</sup>, Lionel Porcar<sup>2</sup>, Cécile Breyton<sup>3</sup>, Christine Ebel<sup>3</sup>, Sandro Keller<sup>1,\*</sup>

<sup>1</sup> Molecular Biophysics, University of Kaiserslautern, Erwin-Schrödinger-Str. 13, 67663 Kaiserslautern, Germany.

<sup>2</sup> Institut Max von Laue Paul Langevin, 38042 Grenoble, France.

<sup>3</sup> Institut de Biologie Structurale (IBS), Université Grenoble Alpes, CEA, CNRS, 38044 Grenoble, France.

\* mail@sandrokeller.com

# These authors contributed equally to this work.

|                               |   |
|-------------------------------|---|
| Theoretical Background.....   | 2 |
| Supplementary Figure.....     | 5 |
| Supplementary Tables.....     | 6 |
| Supplementary References..... | 8 |

## Theoretical Background

### Kinetics of phospholipid exchange among SMALPs

The transfer of lipid molecules among nanoparticles can take place through (i) desorption and interparticle diffusion of lipid monomers through the aqueous phase<sup>1-3</sup> and (ii) lipid exchange through particle collisions<sup>4-7</sup>. If the particles making up the two populations that exchange lipid molecules are identical in size and shape, the observed rate constant resulting from monomer diffusion takes the form<sup>4,5,7</sup>:

$$k_{\text{obs,dif}}(c_L) = \frac{k_{\text{dif}}c_L}{c_L^\circ + c_L} \quad (1)$$

where  $k_{\text{dif}}$  is the diffusional exchange rate constant and  $c_L^\circ$  and  $c_L$  are the bulk solution concentrations of lipid in the donor and acceptor populations, respectively. For second-order (“bimolecular”) collision-dependent lipid transfer, the observed rate constant reads:

$$k_{\text{obs,col}}(c_L) = k_{\text{col}}c_L \quad (2)$$

where  $k_{\text{col}}$  is the second-order collisional exchange rate constant. If both of the above processes are at play, the overall observed rate constant is given by the sum of equations (1) and (2)<sup>4,5,7</sup>:

$$k_{\text{obs}}(c_L) = \frac{k_{\text{dif}}c_L}{c_L^\circ + c_L} + k_{\text{col}}c_L \quad (3)$$

For SMALPs, including higher-order collisional events did not further improve the fit (Supplementary Table 1), suggesting that collisions among more than two SMALPs can be neglected. For example, third-order (“termolecular”) collisional transfer would require an additional term proportional to  $c_L^2$ <sup>4,5,7</sup>.

### Concentration-dependent TR-FRET decays

Upon mixing fluorescently labelled and unlabelled SMALPs, NBD-PE and Rh-PE redistribute among all available SMALPs. This dilution of the fluorescent probe leads to dequenching of NBD-PE, which manifests in an exponential increase in the fluorescence emission intensity at 530 nm according to:

$$F(t) = F_\infty + e^{-k_{\text{obs}}t}(F_0 - F_\infty) + mt \quad (4)$$

Here,  $F(t)$  is the intensity at time  $t$ ,  $F_0$  and  $F_\infty$  are the baseline-corrected original and final intensities, respectively, and  $m$  is the slope of the final baseline, which accounts for linear

signal drift at long times. For global data analysis, equation (3) was inserted into equation (4) to yield:

$$F(t) = F_{\infty} + e^{-\left(\frac{k_{\text{dif}}c_L}{c_L^0 + c_L} + k_{\text{col}}c_L\right)t} (F_0 - F_{\infty}) + mt \quad (5)$$

In this global fitting equation,  $k_{\text{dif}}$  and  $k_{\text{col}}$  are global fitting parameters, whereas  $F_0$ ,  $F_{\infty}$ , and  $m$  are local (i.e.,  $c_L$ -specific) fitting parameters. Best-fit parameter values and 95% confidence intervals were derived by nonlinear least-squares fitting in Excel spreadsheets as detailed elsewhere<sup>8</sup>.

### Temperature-dependent TR-SANS decays

Upon mixing h- and d-SMALPs, lipid exchange leads to an exponential decrease in the SLD with time, as given by:

$$I(t) = I_{\infty} + e^{-k_{\text{obs}}t} (I_0 - I_{\infty}) \quad (6)$$

where  $I(t)$  is the signal intensity at time  $t$ ,  $I_0$  and  $I_{\infty}$  are the initial and final intensities, respectively. According to transition-state theory<sup>9</sup>, the second-order collisional rate constant can be expressed as a function of temperature,  $T$ , according to:

$$k_{\text{col}}(T) = \frac{1}{M} \frac{RT}{N_A h} e^{-\Delta H^{\ddagger}/RT} e^{\Delta S^{\ddagger}/R} \quad (7)$$

with  $R$  being the universal gas constant,  $N_A$  Avogadro's number,  $h$  Planck's constant, and  $\Delta H^{\ddagger}$  and  $\Delta S^{\ddagger}$  the activation enthalpy and entropy, respectively.  $M$  denotes the unit "molar", with  $c_L = 1 \text{ M}$  being the standard concentration. At the  $c_L$  values used for TR-SANS, the relative contribution of monomer diffusion to the overall lipid transfer rate is very small (Fig. 1c), so that the first term on the right-hand side of equation (3) can be neglected. Thus, insertion of equation (7) into equation (3) and further into equation (6) yields:

$$I(t) = I_{\infty} + e^{-t\left(\frac{RT}{N_A h} e^{-\Delta H^{\ddagger}/RT} e^{\Delta S^{\ddagger}/R}\right)_{c_L/M}} (I_0 - I_{\infty}) \quad (8)$$

In this global fitting equation,  $\Delta H^{\ddagger}$  and  $\Delta S^{\ddagger}$  are treated as global fitting parameters, whereas  $I_0$  and  $I_{\infty}$  are local (i.e.,  $T$ -specific) fitting parameters. Again, best-fit parameter values and 95% confidence intervals were derived by nonlinear least-squares fitting in Excel spreadsheets<sup>8</sup>. In the light of the broad temperature range across which phospholipids in SMALPs transition from the gel to the liquid-crystalline (i.e., fluid) state (Supplementary Figure 1), TR-SANS data were fitted in two ways, namely, once including and once excluding the data acquired at 11.1 °C. However, no significant differences were found in the best-fit values of  $\Delta H^{\ddagger}$  or  $\Delta S^{\ddagger}$ .

The entropic component at arbitrary  $c_L$  values is related to the above standard-state value at  $c_L = 1$  M through:

$$-T\Delta S^\ddagger(c_L) = -T\Delta S^\ddagger(1 \text{ M}) - RT\ln(c_L/1 \text{ M}) \quad (9)$$

The apparent values of the molar activation enthalpy and entropy were corrected for the temperature dependence of the buffer viscosity as detailed elsewhere<sup>10</sup>.

### **Diffusion-limited collisional lipid transfer**

In order to estimate the lipid-exchange efficiency of SMALP/SMALP collisions, we determined the diffusion-limited collisional rate constant that would be applicable to nonionic particles as<sup>11</sup>:

$$k_{\text{col,max}} = \frac{8RT}{3\eta} \quad (10)$$

where  $\eta$  denotes the dynamic viscosity of the buffer.

## Supplementary Figure

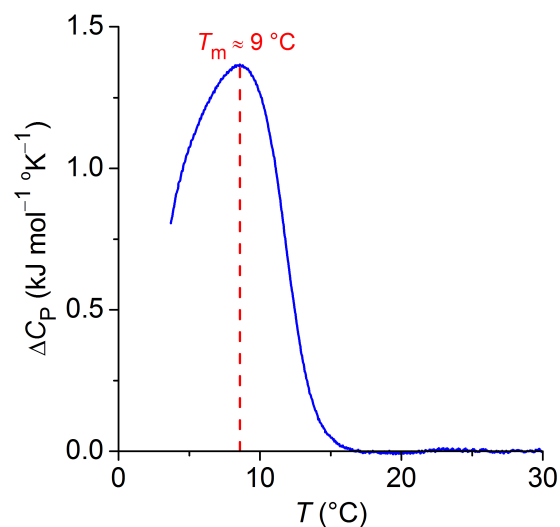

**Supplementary Figure 1** Excess isobaric heat capacity,  $\Delta C_p$  (blue solid line), *versus* temperature,  $T$ , for h/d-SMALPs at a total DMPC concentration of 10 mM as monitored by differential scanning calorimetry. The maximum  $\Delta C_p$  value (red dashed line) was taken as  $T_m$ . The experiment was performed on a VP-DSC (Malvern Instruments, Worcestershire, UK). The sample and reference cells were filled with buffer (50 mM Tris, 200 mM NaCl, pH 7.4) and heated and cooled at a rate of  $6\text{ }^\circ\text{C h}^{-1}$ . Then, the content of the sample cell was replaced by a solution containing h/d-SMALPs. Data obtained from three up-scans were averaged, buffer- and baseline-subtracted, and normalised with respect to total lipid concentration using the software Origin 7.0 (OriginLab, Northampton, USA).

## Supplementary Tables

**Supplementary Table 1** Molar changes in Gibbs free energy of activation,  $\Delta G^\ddagger$ , enthalpy of activation,  $\Delta H^\ddagger$ , and entropy of activation,  $-T\Delta S^\ddagger$ , characterising phospholipid transfer among DMPC SMALPs, DMPC MSP nanodiscs, and DMPC LUVs at a reference temperature of 37 °C and, in the case of SMALPs, a reference lipid concentration of 10 mM, as determined by TR-SANS. 95% confidence intervals are indicated in parentheses below best-fit values.

| Bilayer system          | $\Delta G^\ddagger$ (kJ mol <sup>-1</sup> ) | $\Delta H^\ddagger$ (kJ mol <sup>-1</sup> ) | $-T\Delta S^\ddagger$ (kJ mol <sup>-1</sup> ) | Ref. |
|-------------------------|---------------------------------------------|---------------------------------------------|-----------------------------------------------|------|
| DMPC SMALPs             | 60.4<br>(60.0–60.7)                         | 69.4<br>(62.5–72.3)                         | –9.0<br>(–3.7–14.2)                           | *    |
| DMPC MSP nano-<br>discs | 91.8                                        | 95.5                                        | –3.8                                          | 12   |
| DMPC LUVs               | 101                                         | 82.2                                        | 18.4                                          | 13   |

\* this work

**Supplementary Table 2** Diffusional rate constants,  $k_{\text{dif}}$ , and second- and third-order collisional rate constants,  $k_{\text{col},2^\circ}$  and  $k_{\text{col},3^\circ}$ , respectively, for the transfer of lipids among DMPC SMALPs, DMPC MSP nanodiscs, DMPC LUVs, DMPC SUVs, PC/TC mixed micelles, and TX-100 micelles. 95% confidence intervals are indicated in parentheses below best-fit values.

| System             | $k_{\text{dif}} (\text{s}^{-1})$                       | $k_{\text{col},2^\circ} (\text{M}^{-1}\text{s}^{-1})$ | $k_{\text{col},3^\circ} (\text{M}^{-2}\text{s}^{-1})$ | $T$ ( $^\circ\text{C}$ ) | Ref. |
|--------------------|--------------------------------------------------------|-------------------------------------------------------|-------------------------------------------------------|--------------------------|------|
| DMPC SMALPs        | 0.287<br>(0.282–0.293)                                 | 222<br>(221–223)                                      | –                                                     | 30.0                     | *    |
| DMPC MSP nanodiscs | $6.3 \times 10^{-4}$                                   | –                                                     | –                                                     | 27.0                     | 12   |
| DMPC LUVs          | $7.7 \times 10^{-5}$                                   | –                                                     | –                                                     | 27.1                     | 13   |
| DMPC SUVs          | $1.13 \times 10^{-4}$<br>( $\pm 1.39 \times 10^{-5}$ ) | $3.6 \times 10^{-3}$<br>( $\pm 8.3 \times 10^{-4}$ )  | –                                                     | 30                       | 6    |
| PC/TC micelles     | $3.4 \times 10^{-3}$<br>( $\pm 5.1 \times 10^{-4}$ )   | 7.8<br>( $\pm 0.50$ )                                 | $1.3 \times 10^3$<br>( $\pm 85$ )                     | 25                       | 4    |
| TX-100 micelles    | 12.6                                                   | $1.47 \times 10^6$                                    | –                                                     | 24.6                     | 14   |

\* this work

## Supplementary References

1. Nichols, J. W. & Pagano, R. E. Kinetics of soluble lipid monomer diffusion between vesicles. *Biochemistry* **20**, 2783–2789 (1981).
2. Nichols, J. W. & Pagano, R. E. Use of resonance energy transfer to study the kinetics of amphiphile transfer between vesicles. *Biochemistry* **21**, 1720–1726 (1982).
3. Nichols, J. W. Thermodynamics and kinetics of phospholipid monomer–vesicle interaction. *Biochemistry* **24**, 6390–6398 (1985).
4. Nichols, J. W. Phospholipid transfer between phosphatidylcholine–taurocholate mixed micelles. *Biochemistry* **27**, 3925–3931 (1988).
5. Fullington, D. A., Shoemaker, D. G. & Nichols, J. W. Characterization of phospholipid transfer between mixed phospholipid–bile salt micelles. *Biochemistry* **29**, 879–886 (1990).
6. Jones, J. D. & Thompson, T. E. Mechanism of spontaneous, concentration-dependent phospholipid transfer between bilayers. *Biochemistry* **29**, 1593–1600 (1990).
7. Fullington, D. A. & Nichols, J. W. Kinetic analysis of phospholipid exchange between phosphatidylcholine/taurocholate mixed micelles: Effect of the acyl chain moiety of the micellar phosphatidylcholine. *Biochemistry* **32**, 12678–12684 (1993).
8. Kemmer, G. & Keller, S. Nonlinear least-squares data fitting in Excel spreadsheets. *Nat. Protoc.* **5**, 267–281 (2010).
9. Fernández-Ramos, A., Miller, J. A., Klippenstein, S. J. & Truhlar, D. G. Modeling the kinetics of bimolecular reactions. *Chem. Rev.* **106**, 4518–4584 (2006).
10. Perl, D., Jacob, M., Bánó, M., Stupák, M., Antalík, M. & Schmid, F. X. Thermodynamics of a diffusional protein folding reaction. *Biophys. Chem.* **96**, 173–190 (2002).
11. Kuriyan, J., Konforti, B. & Wemmer, D. in *The Molecules of Life. Physical and Chemical Principles* 815–817 (Garland Science, 2012).
12. Nakano, M. *et al.* Static and dynamic properties of phospholipid bilayer nanodiscs. *J. Am. Chem. Soc.* **131**, 8308–8312 (2009).
13. Nakano, M., Fukuda, M., Kudo, T., Endo, H. & Handa, T. Determination of interbilayer and transbilayer lipid transfer by time-resolved small-angle neutron scattering. *Phys. Rev. Lett.* **98**, 238101 (2007).
14. Rharbi, Y., Li, M., Winnik, M. A. & Hahn, K. G. Temperature dependence of fusion and fragmentation kinetics of Triton X-100 micelles. *J. Am. Chem. Soc.* **122**, 6242–6251 (2000).
